# Supplementary material
Source: HighWire-hosted journal article supplement (https://ard.bmj.com/content/83/4/464)
Supplement: inline-supplementary-material-2 [file inline-supplementary-material-2.pdf]

**Supplementary Table S1. Definitions of the treatment targets used in the current study**

|             | <b>Lupus Low Disease Activity State (LLDAS) [1]</b>                                                                                                                      | <b>Definition of Remission in SLE (DORIS) [2]</b>                                                 |
|-------------|--------------------------------------------------------------------------------------------------------------------------------------------------------------------------|---------------------------------------------------------------------------------------------------|
|             | <i>All relevant criteria should be fulfilled</i>                                                                                                                         |                                                                                                   |
| Criterion 1 | SLEDAI-2K <sup>1</sup> ≤4, with no activity in major organ systems (renal, neurological, cardiopulmonary, vasculitis, fever)                                             | Clinical SLEDAI-2K <sup>1</sup> =0                                                                |
| Criterion 2 | No new features of lupus disease activity compared with the previous assessment, defined as any new SLEDAI-2K component that was not present at the previous assessment. | n/a                                                                                               |
| Criterion 3 | SELENA-SLEDAI physician global assessment ≤1 <sup>2</sup>                                                                                                                | SELENA-SLEDAI physician global assessment <0.5 <sup>2</sup>                                       |
| Criterion 4 | Current prednisolone (or equivalent) dose ≤7.5 mg daily                                                                                                                  | Current prednisolone (or equivalent) dose ≤5 mg daily                                             |
| Criterion 5 | Standard maintenance doses of immunosuppressive drugs and approved biological agents <sup>3</sup>                                                                        | Standard maintenance doses of immunosuppressive drugs and approved biological agents <sup>3</sup> |

<sup>1</sup> SLE disease activity index-2000; <sup>2</sup> On a scale of 0 (no activity) to 3 (maximum activity); <sup>3</sup> Includes methotrexate, azathioprine, mycophenolate mofetil, mycophenolic acid, leflunomide, cyclosporine, cyclophosphamide, tacrolimus, rituximab and belimumab. Antimalarials are permitted.

**Supplementary Table S2. Organ involvement in SLE patients (inclusion visit)**

| <b>SLEDAI-2K item</b>                     | <b>N (%)</b> |
|-------------------------------------------|--------------|
| SLEDAI1 -Seizure                          | 2 (0.6%)     |
| SLEDAI2 -Psychosis                        | 2 (0.6%)     |
| SLEDAI3 -Confusion/altered mental status  | 0            |
| SLEDAI4 -Optic neuritis / retinal exudate | 3 (0.9%)     |
| SLEDAI5 -Cranial neuropathy               | 8 (2.3%)     |
| SLEDAI6 -Headache                         | 0            |
| SLEDAI7 -Cerebrovascular disease          | 6 (1.7%)     |
| SLEDAI8 -Vasculitis                       | 15 (4.3%)    |
| SLEDAI9 -Arthritis                        | 240 (69.4%)  |
| SLEDAI10 -Myositis                        | 1 (0.3%)     |
| SLEDAI11 -Urine casts                     | 16 (4.6%)    |
| SLEDAI12 -Haematuria                      | 30 (8.7%)    |
| SLEDAI13 -Proteinuria                     | 42 (12.1%)   |
| SLEDAI14 -Pyuria                          | 13 (3.8%)    |
| SLEDAI15 -Inflammatory skin rash          | 185 (53.5%)  |
| SLEDAI16 -Hair loss                       | 76 (22.0%)   |
| SLEDAI17 -Mucosal ulcers                  | 11.6%        |
| SLEDAI18 -Pleural effusion                | 16 (4.6%)    |
| SLEDAI19 -Pericarditis                    | 22 (6.4%)    |
| SLEDAI20 -Low serum C3/C4                 | 141 (40.8%)  |
| SLEDAI21 -High serum anti-dsDNA           | 113 (32.7%)  |
| SLEDAI22 -Fever                           | 16 (4.6%)    |
| SLEDAI23 -Thrombocytopenia                | 44 (12.7%)   |
| SLEDAI24 -Leucopenia                      | 26 (7.5%)    |

**Supplementary Table S3. Risk for subsequent severe flare in LLDAS+/DORIS- compared to DORIS state (visit-by-visit analysis)**

| LLDAS+/DORIS- subgroup<br>versus DORIS (reference) | HR (95% CI) for subsequent severe flare <sup>1</sup> |                                     |                                    |
|----------------------------------------------------|------------------------------------------------------|-------------------------------------|------------------------------------|
|                                                    | Basic model                                          | Adjusted for<br>clinical SLEDAI-2K  | Adjusted for<br>PGA                |
| Glucocorticoid dose                                |                                                      |                                     |                                    |
| ≤5 mg/day                                          | <b>1.69 (1.02–2.80)<sup>a</sup></b>                  | 1.48 (0.82–2.68)                    | 1.35 (0.80–2.28)                   |
| >5 mg/day                                          | <b>1.97 (1.07–3.63)<sup>a</sup></b>                  | 1.74 (0.89–3.42)                    | 1.65 (0.89–3.05)                   |
| Clinical SLEDAI-2K                                 | Basic model                                          | Adjusted for<br>glucocorticoid dose | Adjusted for<br>PGA                |
| 0                                                  | 1.43 (0.76–2.72)                                     | 1.43 (0.75–2.71)                    | 1.20 (0.63–2.28)                   |
| >0                                                 | <b>1.96 (1.19–3.28)<sup>b</sup></b>                  | <b>1.95 (1.18–3.22)<sup>b</sup></b> | 1.58 (0.94–2.64)                   |
| PGA                                                | Basic model                                          | Adjusted for<br>glucocorticoid dose | Adjusted for<br>clinical SLEDAI-2K |
| <0.5                                               | 1.27 (0.37–4.29)                                     | 1.24 (0.37–4.24)                    | 1.09 (0.31–3.84)                   |
| ≥0.5                                               | <b>1.82 (1.13–2.92)<sup>a</sup></b>                  | <b>1.81 (1.13–2.91)<sup>a</sup></b> | 1.61 (0.92–2.81)                   |

<sup>1</sup> Multiple-failures hazard models comparing subgroups of LLDAS+/DORIS- visits (according to glucocorticoid dose, clinical SLEDAI-2K, PGA) against DORIS visits (reference); the basic model included gender, age and follow-up duration as covariates, whereas additional models adjusted also for the effects of glucocorticoid dose, clinical SLEDAI-2K or PGA; <sup>a</sup> p<0.05; <sup>b</sup> p<0.01; HR, hazard ratio; 95% CI, 95% confidence interval; PGA, SELENA-SLEDAI Physician Global Assessment; SLEDAI-2K, SLE disease activity index 2000; DORIS, Definition of Remission in SLE; LLDAS, Lupus Low Disease Activity State

**Supplementary Table S4. Effect of DORIS and LLDAS attainment (% of cumulative time) against the risk for organ damage accrual and severe flares**

|                              | Organ damage accrual <sup>1</sup> |                    | Severe flares <sup>2</sup> |                    |
|------------------------------|-----------------------------------|--------------------|----------------------------|--------------------|
|                              | RR (95% CI)                       | Z-statistic        | RR (95% CI)                | Z-statistic        |
| <i>Model A</i> <sup>3</sup>  |                                   |                    |                            |                    |
| <b>DORIS</b>                 | 0.992 (0.987–0.997)               | -3.01<br>(p=0.003) | 0.984 (0.980–0.989)        | -7.16<br>(p<0.001) |
| <b>LLDAS exclusive DORIS</b> | 0.994 (0.988–0.999)               | -2.02<br>(p=0.044) | 0.993 (0.989–0.996)        | -4.05<br>(p<0.001) |
| <i>Model B</i> <sup>4</sup>  |                                   |                    |                            |                    |
| <b>LLDAS inclusive DORIS</b> | 0.993 (0.989–0.997)               | -3.32<br>(p=0.001) | 0.989 (0.986–0.991)        | -8.86<br>(p<0.001) |

<sup>1</sup> Cumulative increase in SDI during the observation period; <sup>2</sup> Number of severe flares during the observation period; <sup>3</sup> Generalized linear model (GLM; negative binomial) using both DORIS (per 1%-time unit) and LLDAS exclusive DORIS (per 1%-time unit) as predictors. Additional variables included in the model were gender, age at inclusion, disease duration, baseline SLEDAI-2K, duration of follow-up; <sup>4</sup> GLM using LLDAS (per 1%-time unit) as predictors. Additional variables included in the model were gender, age at inclusion, disease duration, baseline SLEDAI-2K, duration of follow-up. RR, risk ratio; 95% CI, 95% confidence interval; DORIS, Definition of Remission in SLE; LLDAS, Lupus Low Disease Activity State

**Supplementary Table S5. Frequency of SLE patients in remission (DORIS) and low disease activity (LLDAS) who accrued or not organ damage and severe flares**

|                              | Organ damage accrual<br>(≥1-point increase in SDI) |            | Severe flare(s)<br>(≥1 incident) |            |
|------------------------------|----------------------------------------------------|------------|----------------------------------|------------|
|                              | No                                                 | Yes        | No                               | Yes        |
| <b>SLE patients in DORIS</b> |                                                    |            |                                  |            |
| Ever attainment <sup>1</sup> | 152 (70.7%)                                        | 63 (29.3%) | 174 (80.9%)                      | 41 (19.1%) |
| ≥30% of time <sup>2</sup>    | 98 (75.4%)                                         | 32 (24.6%) | 119 (91.5%)                      | 11 (8.5%)  |
| ≥40% of time                 | 80 (77.7%)                                         | 23 (22.3%) | 97 (94.2%)                       | 6 (5.8%)   |
| ≥50% of time                 | 65 (81.3%)                                         | 15 (18.8%) | 78 (97.5%)                       | 2 (2.5%)   |
| ≥60% of time                 | 45 (81.8%)                                         | 10 (18.2%) | 54 (98.2%)                       | 1 (1.8%)   |
| ≥70% of time                 | 28 (84.8%)                                         | 5 (15.2%)  | 33 (100.0%)                      | 0 (0.0%)   |
| <b>SLE patients in LLDAS</b> |                                                    |            |                                  |            |
| Ever attainment              | 224 (69.3%)                                        | 99 (30.7%) | 235 (72.8%)                      | 88 (27.2%) |
| ≥30% of time                 | 180 (70.6%)                                        | 75 (29.4%) | 206 (80.8%)                      | 49 (19.2%) |
| ≥40% of time                 | 160 (72.4%)                                        | 61 (27.6%) | 193 (87.3%)                      | 28 (12.7%) |
| ≥50% of time                 | 145 (74.4%)                                        | 50 (25.6%) | 173 (88.7%)                      | 22 (11.3%) |
| ≥60% of time                 | 115 (79.9%)                                        | 29 (20.1%) | 135 (93.8%)                      | 9 (6.3%)   |
| ≥70% of time                 | 85 (85.0%)                                         | 15 (15.0%) | 98 (98.0%)                       | 2 (2.0%)   |

<sup>1</sup> Attainment on at least one visit; <sup>2</sup> Proportion of follow-up time in the corresponding target; DORIS, Definition of Remission in SLE; LLDAS, Lupus Low Disease Activity State

**Supplementary Table S6. Comparison between durable attainment of remission (DORIS) and of low disease activity (LLDAS) against the risk for organ damage accrual and severe flares**

| <i>Comparator group</i>                              | <i>Reference group</i>           | <b>Organ damage accrual</b> |         | <b>Severe flare</b> |         |
|------------------------------------------------------|----------------------------------|-----------------------------|---------|---------------------|---------|
|                                                      |                                  | RR (95% CI)                 | P value | RR (95% CI)         | P value |
| LLDAS <sup>+</sup> /DORIS <sup>-</sup><br>≥24 months | DORIS <sup>+</sup><br>≥24 months | 1.31 (0.82–2.11)            | 0.261   | 2.06 (1.22–3.49)    | 0.007   |
| LLDAS <sup>+</sup> /DORIS <sup>-</sup><br>≥50% time  | DORIS <sup>+</sup><br>≥50% time  | 1.29 (0.83–2.00)            | 0.263   | 2.32 (1.48–3.64)    | <0.001  |

Generalized linear model (negative binomial) including gender, age at inclusion, duration of follow-up as covariates; outcomes included the cumulative: a) increase in SDI, and b) severe flares during the follow-up period; RR, risk ratio; 95% CI, 95% confidence interval; DORIS, Definition of Remission in SLE; LLDAS, Lupus Low Disease Activity State

**Supplementary Table S7. Operational characteristics of different cut-offs of time exposure (percentage of total observation period) in each treatment target against organ damage accrual in SLE patients with active moderate-to-severe disease**

|              | Frequency <sup>1</sup> | GLM model fit <sup>2</sup> |        | Classification metrics <sup>3</sup> |             |        |
|--------------|------------------------|----------------------------|--------|-------------------------------------|-------------|--------|
|              |                        | AIC                        | BIC    | Sensitivity                         | Specificity | Sum    |
| <b>DORIS</b> |                        |                            |        |                                     |             |        |
| ≥30%         | 37.6%                  | 721.44                     | 729.14 | 0.4242                              | 0.6832      | 1.1074 |
| ≥40%         | 29.9%                  | 714.21                     | 721.91 | 0.3463                              | 0.7723      | 1.1186 |
| ≥50% *       | 23.3%                  | 714.09                     | 721.79 | 0.2814                              | 0.8515      | 1.1329 |
| ≥60%         | 15.8%                  | 712.53                     | 720.24 | 0.1948                              | 0.9010      | 1.0958 |
| ≥70%         | 9.5%                   | 713.96                     | 721.66 | 0.1212                              | 0.9505      | 1.0717 |
| <b>LLDAS</b> |                        |                            |        |                                     |             |        |
| ≥30%         | 73.3%                  | 723.61                     | 731.32 | 0.7403                              | 0.2772      | 1.0175 |
| ≥40%         | 63.2%                  | 720.08                     | 727.79 | 0.6580                              | 0.4158      | 1.0739 |
| ≥50%         | 55.7%                  | 716.14                     | 723.84 | 0.5931                              | 0.5248      | 1.1178 |
| ≥60% *       | 41.7%                  | 701.90                     | 709.61 | 0.4848                              | 0.7327      | 1.2175 |
| ≥70%         | 29.0%                  | 701.37                     | 709.08 | 0.3636                              | 0.8515      | 1.2151 |

<sup>1</sup> Proportion (%) of cohort who meet each definition; <sup>2</sup> Information criteria (Akaike Information Criterion [AIC], Bayesian Information Criterion [BIC]) obtained from the generalized linear model (GLM) treating organ damage accrual as dependent variable and each target cut-off as predictor; <sup>3</sup> Obtained from 2×2 contingency tables of favourable outcome (free or not of new organ damage) by each target cut-off. Asterisk (\*) denotes the selected target cut-off based on optimal combination of feasibility (frequency), model fit and combined sensitivity and specificity. DORIS, Definition of Remission in SLE; LLDAS, Lupus Low Disease Activity State

**Supplementary Table S8. Operational characteristics of different cut-offs of exposure (months of sustained attainment) in each treatment target against organ damage accrual in SLE patients with active moderate-to-severe disease**

|              | Frequency <sup>1</sup> | GLM model fit <sup>2</sup> |        | Classification metrics <sup>3</sup> |             |        |
|--------------|------------------------|----------------------------|--------|-------------------------------------|-------------|--------|
|              |                        | AIC                        | BIC    | Sensitivity                         | Specificity | Sum    |
| <b>DORIS</b> |                        |                            |        |                                     |             |        |
| ≥9 months    | 39.3%                  | 686.08                     | 693.62 | 0.4208                              | 0.6634      | 1.0842 |
| ≥12 months   | 35.8%                  | 687.09                     | 694.63 | 0.3846                              | 0.6931      | 1.0777 |
| ≥18 months   | 27.7%                  | 682.91                     | 690.45 | 0.3077                              | 0.7822      | 1.0899 |
| ≥24 months * | 20.2%                  | 680.25                     | 687.79 | 0.2353                              | 0.8614      | 1.0967 |
| ≥30 months   | 15.3%                  | 684.00                     | 691.55 | 0.1719                              | 0.8812      | 1.0531 |
| ≥36 months   | 10.9%                  | 679.98                     | 687.52 | 0.1312                              | 0.9307      | 1.0619 |
| <b>LLDAS</b> |                        |                            |        |                                     |             |        |
| ≥12 months   | 66.4%                  | 689.34                     | 696.88 | 0.6847                              | 0.3861      | 1.0708 |
| ≥15 months   | 62.3%                  | 688.19                     | 695.73 | 0.6471                              | 0.4356      | 1.0827 |
| ≥18 months   | 56.1%                  | 682.90                     | 690.44 | 0.5928                              | 0.5149      | 1.1076 |
| ≥24 months   | 45.5%                  | 683.66                     | 691.20 | 0.4887                              | 0.6238      | 1.1125 |
| ≥30 months   | 35.8%                  | 684.23                     | 691.77 | 0.3937                              | 0.7228      | 1.1164 |
| ≥36 months * | 28.0%                  | 678.91                     | 686.46 | 0.3213                              | 0.8119      | 1.1331 |
| ≥42 months   | 19.3%                  | 683.24                     | 690.78 | 0.2262                              | 0.8812      | 1.1074 |

<sup>1</sup> Proportion (%) of cohort who meet each definition; <sup>2</sup> Information criteria (Akaike Information Criterion [AIC], Bayesian Information Criterion [BIC]) obtained from the generalized linear model (GLM) treating organ damage accrual as dependent variable and each target cut-off as predictor; <sup>3</sup> Obtained from 2×2 contingency tables of favourable outcome (free or not of new organ damage) by each target cut-off. Asterisk (\*) denotes the selected target cut-off based on optimal combination of feasibility (frequency), model fit and combined sensitivity and specificity. DORIS, Definition of Remission in SLE; LLDAS, Lupus Low Disease Activity State



**Supplementary Table S9. Sustained attainment of DORIS  $\geq 24$  months and LLDAS  $\geq 36$  months is associated with significant reduction in the risk for adverse events in patients with SLE**

| Adverse event                                           | Incidence rate ratio <sup>2</sup><br>(95% CI) | P value   |
|---------------------------------------------------------|-----------------------------------------------|-----------|
| <b>All adverse events</b>                               |                                               |           |
| DORIS $\geq 24$ months vs. $< 24$ months                | 0.79 (0.71–0.85)                              | $< 0.001$ |
| LLDAS $\geq 36$ months vs. $< 36$ months                | 0.89 (0.85–0.93)                              | $< 0.001$ |
| <b>Serious adverse events but not fatal</b>             |                                               |           |
| DORIS $\geq 24$ months vs. $< 24$ months                | 0.61 (0.44–0.84)                              | 0.003     |
| LLDAS $\geq 36$ months vs. $< 36$ months                | 0.67 (0.54–0.83)                              | $< 0.001$ |
| <b>Serious adverse events requiring hospitalization</b> |                                               |           |
| DORIS $\geq 24$ months vs. $< 24$ months                | 0.66 (0.49–0.88)                              | 0.005     |
| LLDAS $\geq 36$ months vs. $< 36$ months                | 0.70 (0.56–0.87)                              | 0.002     |
| <b>Death</b>                                            |                                               |           |
| DORIS $\geq 24$ months vs. $< 24$ months                | – <sup>2</sup>                                | –         |
| LLDAS $\geq 36$ months vs. $< 36$ months                | 0.20 (0.02–2.53)                              | 0.212     |

Adverse events during follow-up were classified according to the CTCAE system.<sup>1</sup> Obtained from generalized linear model adjusting for the effects of age, gender, age and disease duration; <sup>2</sup> Cannot be estimated; DORIS, Definition of Remission in SLE; LLDAS, Lupus Low Disease Activity State

**Supplementary Table S10. Estimates of cumulative organ damage accrual and severe flares across the three patient clusters**

| <b>Organ damage accrual (delta-SDI per patient-year)</b> |                 |         |                                 |             |                      |
|----------------------------------------------------------|-----------------|---------|---------------------------------|-------------|----------------------|
| Cluster                                                  | Crude estimates |         | Adjusted estimates <sup>1</sup> |             |                      |
|                                                          | Mean (SEM)      | ANOVA   | Mean (SEM)                      | 95% CI      | Wald test            |
| <b>1</b>                                                 | 0.086 (0.028)   |         | 0.095 (0.026)                   | 0.043–0.146 |                      |
| <b>2</b>                                                 | 0.136 (0.022)   | p=0.297 | 0.136 (0.019)                   | 0.099–0.173 | p=0.325              |
| <b>3</b>                                                 | 0.110 (0.017)   |         | 0.103 (0.021)                   | 0.062–0.144 |                      |
| <b>Severe flares (no. events per patient-year)</b>       |                 |         |                                 |             |                      |
| Cluster                                                  | Crude estimates |         | Adjusted estimates <sup>1</sup> |             |                      |
|                                                          | Mean (SEM)      | ANOVA   | Mean (SEM)                      | 95% CI      | Wald test            |
| <b>1</b>                                                 | 0.220 (0.044)   |         | 0.184 (0.039)                   | 0.107–0.260 |                      |
| <b>2</b>                                                 | 0.149 (0.022)   | p<0.001 | 0.155 (0.028)                   | 0.100–0.210 | p<0.001 <sup>2</sup> |
| <b>3</b>                                                 | 0.352 (0.030)   |         | 0.371 (0.031)                   | 0.311–0.431 |                      |

<sup>1</sup> Generalized linear model adjusting for the effects of sex, age and duration of follow-up; <sup>2</sup> post-hoc pairwise Sidak test revealed significant difference between Cluster 3 and Cluster 2 (p<0.001) and between Cluster 3 and Cluster 1 (p=0.001); SEM, standard error of the mean; ANOVA, analysis of variance

**Supplementary Table S11. Accrued organ damage in the study sample of SLE patients with active moderate-to-severe disease**

|                                                         | Cluster 1 | Cluster 2 | Cluster 3 | All patients |       |
|---------------------------------------------------------|-----------|-----------|-----------|--------------|-------|
|                                                         | n         | n         | n         | n            |       |
| 1. Cataract                                             | 3         | 7         | 7         | 17           | 10.5% |
| 2. Retinal change or optic atrophy                      | 0         | 2         | 2         | 4            | 2.5%  |
| 3. Cognitive impairment or major psychosis              | 1         | 4         | 5         | 10           | 6.2%  |
| 4. Seizures requiring therapy for $\geq 6$ months       | 0         | 1         | 1         | 2            | 1.2%  |
| 5. Cerebrovascular Accident                             | 1         | 3         | 3         | 7            | 4.3%  |
| 6. Cranial/Peripheral Neuropathy (excluding optic)      | 1         | 4         | 5         | 10           | 6.2%  |
| 7. Transverse Myelitis                                  | 0         | 2         | 0         | 2            | 1.2%  |
| 8. Estimated or Measured GFR $< 50\%$                   | 1         | 3         | 0         | 4            | 2.5%  |
| 9. Proteinuria $\geq 3.5$ g/24 hours                    | 1         | 1         | 0         | 2            | 1.2%  |
| 10. End-stage renal disease                             | 0         | 0         | 0         | 0            | 0.0%  |
| 11. Pulmonary Hypertension                              | 1         | 1         | 1         | 3            | 1.9%  |
| 12. Pulmonary Fibrosis (clinical or radiographic)       | 0         | 1         | 1         | 2            | 1.2%  |
| 13. Shrinking Lung (radiographic)                       | 0         | 0         | 0         | 0            | 0.0%  |
| 14. Pleural Fibrosis (radiographic)                     | 0         | 0         | 0         | 0            | 0.0%  |
| 15. Pulmonary Infarction (radiographic)                 | 0         | 1         | 0         | 1            | 0.6%  |
| 16. Angina or Coronary Artery Bypass                    | 0         | 2         | 1         | 3            | 1.9%  |
| 17. Myocardial Infarction                               | 1         | 2         | 0         | 3            | 1.9%  |
| 18. Cardiomyopathy (left ventricular dysfunction)       | 0         | 1         | 2         | 3            | 1.9%  |
| 19. Valvular disease (murmur $> 3/6$ )                  | 1         | 6         | 2         | 9            | 5.6%  |
| 20. Pericarditis for $\geq 6$ months or pericardiectomy | 0         | 2         | 1         | 3            | 1.9%  |
| 21. Claudication for $\geq 6$ months                    | 1         | 1         | 0         | 2            | 1.2%  |
| 22. Minor tissue loss - peripheral vasc. disease        | 1         | 0         | 0         | 1            | 0.6%  |
| 23. Significant tissue loss - peripheral vasc. disease  | 0         | 0         | 0         | 0            | 0.0%  |
| 24. Venous Thrombosis with complications                | 1         | 0         | 1         | 2            | 1.2%  |
| 25. Infarction or resection of bowel/GI, spleen         | 3         | 3         | 2         | 8            | 4.9%  |
| 26. Mesenteric Insufficiency                            | 0         | 0         | 0         | 0            | 0.0%  |
| 27. Chronic Peritonitis                                 | 0         | 0         | 0         | 0            | 0.0%  |
| 28. Stricture or Upper GI tract surgery                 | 0         | 1         | 0         | 1            | 0.6%  |
| 29. Chronic Pancreatitis                                | 0         | 0         | 0         | 0            | 0.0%  |
| 30. Muscle Atrophy or Weakness                          | 1         | 5         | 2         | 8            | 4.9%  |
| 31. Deforming or erosive arthritis                      | 1         | 1         | 2         | 4            | 2.5%  |
| 32. Osteoporosis with fracture or vertebral collapse    | 1         | 4         | 4         | 9            | 5.6%  |
| 33. Avascular Necrosis                                  | 0         | 0         | 2         | 2            | 1.2%  |
| 34. Osteomyelitis                                       | 0         | 1         | 0         | 1            | 0.6%  |
| 35. Tendon rupture                                      | 1         | 3         | 4         | 8            | 4.9%  |
| 36. Scarring Chronic Alopecia                           | 1         | 1         | 3         | 5            | 3.1%  |
| 37. Scarring of panniculus (not scalp, pulp space)      | 0         | 1         | 2         | 3            | 1.9%  |
| 38. Skin ulceration (excl. thrombosis) $\geq 6$ months  | 0         | 1         | 0         | 1            | 0.6%  |
| 39. Premature Gonadal Failure                           | 1         | 2         | 1         | 4            | 2.5%  |
| 40. Diabetes (regardless of therapy)                    | 1         | 4         | 4         | 9            | 5.6%  |
| 41. Malignancy (except dysplasia)                       | 2         | 2         | 5         | 9            | 5.6%  |

**Supplementary Table S12. Use of lupus treatments according to actively involved organs/domains (analysis of all visits)**

| SLEDAI items        | Antimalarials |       |     | Leflunomide |      | Methotrexate |       | Ciclosporin |      | Azathioprine |       | Mycophenolate |       | CYC   |       | IVIG  |       | Rituximab |      | Belimumab |      |      |      |       |       |       |       |      |
|---------------------|---------------|-------|-----|-------------|------|--------------|-------|-------------|------|--------------|-------|---------------|-------|-------|-------|-------|-------|-----------|------|-----------|------|------|------|-------|-------|-------|-------|------|
|                     | N             |       |     | N           |      | N            |       | N           |      | N            |       | N             |       | N     |       | N     |       | N         |      | N         |      |      |      |       |       |       |       |      |
| <b>Neurological</b> | 44            | 67.7% | *   | 0           | 0.0% | 11           | 16.9% | 0           | 0.0% | 11           | 16.9% | 10            | 15.4% | 14    | 21.5% | ***   | 0     | 0.0%      | 5    | 7.7%      | 5    | 7.7% |      |       |       |       |       |      |
| <b>Vasculitis</b>   | 44            | 74.6% |     | 0           | 0.0% | 7            | 11.9% | *           | 17   | 28.8%        | ***   | 10            | 16.9% | 8     | 13.6% |       | 0     | 0.0%      | 2    | 3.4%      | 3    | 5.1% | 13   | 22.0% | **    |       |       |      |
| <b>Arthritis</b>    | 1137          | 80.9% |     | 95          | 6.8% | ***          | 498   | 35.4%       | ***  | 30           | 2.1%  | ***           | 286   | 20.3% | **    | 100   | 7.1%  | ***       | 49   | 3.5%      | 4    | 0.3% | 77   | 5.5%  | **    | 159   | 11.3% |      |
| <b>Myositis</b>     | 8             | 57.1% | *   | 0           | 0.0% | 1            | 7.1%  |             | 1    | 7.1%         |       | 2             | 14.3% |       | 6     | 42.9% | **    | 1         | 7.1% | 0         | 0.0% | 0    | 0.0% | 2     | 14.3% |       |       |      |
| <b>Renal</b>        | 194           | 78.5% |     | 1           | 0.4% | **           | 11    | 4.5%        | ***  | 11           | 4.5%  |               | 49    | 19.8% |       | 96    | 38.9% | ***       | 38   | 15.4%     | ***  | 0    | 0.0% | 12    | 4.9%  | 10    | 4.0%  | ***  |
| <b>Rash</b>         | 842           | 82.1% |     | 53          | 5.2% | *            | 292   | 28.5%       | ***  | 36           | 3.5%  |               | 240   | 23.4% |       | 96    | 9.4%  | ***       | 41   | 4.0%      | 2    | 0.2% | 53   | 5.2%  | 112   | 10.9% |       |      |
| <b>Hair loss</b>    | 354           | 84.5% | *   | 16          | 3.8% |              | 99    | 23.6%       |      | 19           | 4.5%  |               | 128   | 30.5% | ***   | 33    | 7.9%  | ***       | 11   | 2.6%      | 3    | 0.7% | 19   | 4.5%  | 60    | 14.3% |       |      |
| <b>Ulcers</b>       | 195           | 83.0% |     | 10          | 4.3% |              | 70    | 29.8%       |      | 7            | 3.0%  |               | 53    | 22.6% |       | 10    | 4.3%  | ***       | 6    | 2.6%      | 0    | 0.0% | 9    | 3.8%  | 39    | 16.6% | *     |      |
| <b>Serositis</b>    | 51            | 76.1% |     | 1           | 1.5% |              | 10    | 14.9%       |      | 1            | 1.5%  |               | 15    | 22.4% |       | 9     | 13.4% |           | 5    | 7.5%      | 0    | 0.0% | 0    | 0.0%  | 9     | 13.4% |       |      |
| <b>Low C3/C4</b>    | 550           | 74.9% | *** | 4           | 0.5% | ***          | 104   | 14.2%       | ***  | 41           | 5.6%  | **            | 171   | 23.3% |       | 160   | 21.8% | ***       | 29   | 4.0%      | 4    | 0.5% | 29   | 4.0%  | 129   | 17.6% | ***   |      |
| <b>Anti-DNA</b>     | 512           | 78.6% |     | 6           | 0.9% | ***          | 82    | 12.6%       | ***  | 25           | 3.8%  |               | 141   | 21.7% |       | 161   | 24.7% | ***       | 24   | 3.7%      | 3    | 0.5% | 22   | 3.4%  | 126   | 19.4% | ***   |      |
| <b>Fever</b>        | 24            | 70.6% |     | 0           | 0.0% |              | 9     | 26.5%       |      | 1            | 2.9%  |               | 7     | 20.6% |       | 2     | 5.9%  |           | 0    | 0.0%      | 0    | 0.0% | 1    | 2.9%  | 5     | 14.7% |       |      |
| <b>Thromb/penia</b> | 139           | 78.5% |     | 2           | 1.1% | *            | 25    | 14.1%       | **   | 17           | 9.6%  | ***           | 38    | 21.5% |       | 31    | 17.5% |           | 17   | 9.6%      | **   | 6    | 3.4% | 18    | 10.2% | ***   | 14    | 7.9% |
| <b>Leukopenia</b>   | 113           | 80.1% |     | 1           | 0.7% | *            | 24    | 17.0%       | *    | 14           | 9.9%  | ***           | 37    | 26.2% |       | 18    | 12.8% |           | 4    | 2.8%      | 0    | 0.0% | 8    | 5.7%  | 25    | 17.7% | *     |      |

For each SLEDAI-2K item(s), data represent the number (%) of visit where each treatment was used. Asterisks denote statistically significant differences as compared to the use of each medication in visits without the particular SLEDAI-2K item(s) (\*p<0.05; \*\*p<0.01; \*\*\*p<0.001). CYC, cyclophosphamide; IVIG, intravenous immunoglobulin

**References**

1. Golder V, Kandane-Rathnayake R, Huq M, *et al.* Lupus low disease activity state as a treatment endpoint for systemic lupus erythematosus: a prospective validation study. *The Lancet Rheumatology* 2019;1:e95-e102.
2. Correction: 2021 DORIS definition of remission in SLE: final recommendations from an international task force. *Lupus Sci Med* 2022;9.
